# Supplementary material
Source: MDPI journal article supplement (https://www.mdpi.com/2220-9964/8/11/510)
Supplement: s1 [file s1]

## Annex: IMPLEMENTATION OF METRIC S

This annex collects the (PostgreSQL) SQL scripts that implement the computation of metric *S*. The solution is general, so the scripts are usable for carrying out specific case studies. The Spatial DataBase (briefly *SDB*) is called Violation.

The SDB's tables:

```
CREATE TABLE GeoArea (  
  id      serial PRIMARY KEY,  
  geom    geometry(MultiPolygon, SRS_code)  
);
```

SRS\_code is the number of a metric Spatial Reference System (for instance, in the case of Italy: 32633).

```
CREATE TABLE ContourLines (  
  id      serial PRIMARY KEY,  
  elevation numeric,  
  geom    geometry(MultiLineString, SRS_code)  
);
```

```
CREATE INDEX ContourLines_geom_gist  
ON public.ContourLines  
USING gist (geom);
```

```
CREATE TABLE Rivers (  
  id      integer,  
  name    character varying(35),  
  geom    geometry(MultiLineString, SRS_code),  
  river_buffer geometry(Polygon, SRS_code)  
);
```

```
CREATE TABLE Buildings (  
  id      serial PRIMARY KEY,  
  geom    geometry(Point, SRS_code),  
  status  bool,  
  elevation numeric,  
  S      numeric  
);
```

```
CREATE INDEX Buildings_geom_gist  
ON public.Buildings  
USING gist (geom);
```

Column *status* holds true if the building intersects the strip of respect of some river, in other word if it is an IB.

Fig.A shows the screen of the PostgreSQL tables of the Violation SDB.

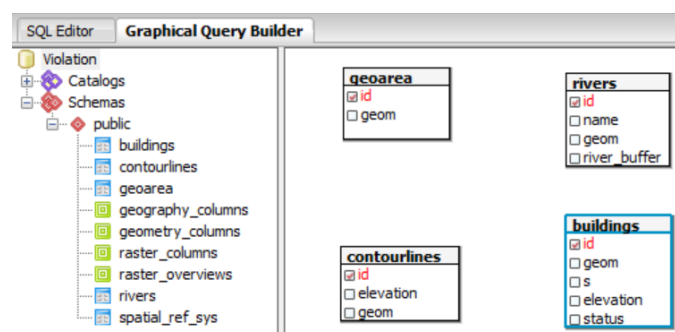

Fig. A The tables of the Violation SDB.

Initialization (to a dummy value) of columns *status*, *S* and *elevation*:

```
UPDATE Buildings
  SET status = false, S=-1, elevation=-1;
```

### *Creation of the rivers' buffer*

```
UPDATE Rivers
  SET river_buffer = ST_Buffer (geom, w)
  WHERE id BETWEEN 1 AND totalNumberOfRivers;
```

$w$  is the width (in meters) of the strip of territory where it is forbidden to build (according to the Italian Law n.42  $w = 150$ ); while `totalNumberOfRivers` denotes the total number of the rivers that crosses the *GeoArea*.

Consistent with the DB-centric architecture adopted in the paper, the implementation of metric  $S$  is carried out in terms of spatial SQL queries. The invocation of several spatial SQL functions greatly simplified the implementation of metric  $S$ . In details, the following functions were used: `ST_Buffer()`, `ST_Area()`, `ST_Centroid()`, `ST_ClosestPoint()`, `ST_Distance()`, `ST_DWithin()`, `ST_Intersects()`, `ST_Intersection()`. In the implementation, we made large use of the `WITH` clause. `WITH` provides a way to write auxiliary statements for use in a larger query. These statements, which are often referred to as *Common Table Expressions* (CTEs), can be thought of as defining temporary tables that exist just for one query.

### *The queries*

Creation of a working view aimed at simplifying the code of queries.

#### Q1

```
CREATE VIEW workingView (
  river_id, river_name, river_geom, river_buffer,
  building_id, building_geom, status,
  P, distance, S, elevation) AS
SELECT
  r.river_id, r.name, r.geom, r.river_buffer,
  b.id, b.geom,
  ST_Area(ST_Intersection(river_buffer, b.geom)) /
  ST_Area(b.geom) AS P,
  ST_Intersects (river_buffer, b.geom) AS status,
  ST_Distance(r.geom, b.geom) AS distance,
  S, elevation
FROM Rivers AS r, Buildings AS b
WHERE ST_Intersects(river_buffer, b.geom) = true
```

In Q1  $P$  implements Eq.1 (of the paper), while  $distance$  denotes the Euclidian distance between the boundary of the generic IB and the geometry that models the river bed. The tuples selected by `workingView` concern the IBs because of the condition `ST_Intersects(river_buffer, b.geom) = true`.

### *STEP 1: census of the IBs*

Queries Q2A returns the total number of IBs, while query Q2B returns their list and the (WGS 84 long-lat) coordinates of their centroid.

#### Q2A (Number of IBs)

```
SELECT COUNT(DISTINCT(building_id))
FROM workingView
```

#### Q2B (IBs listing)

```
SELECT DISTINCT building_id,
  ST_AsText(ST_Transform(ST_Centroid(building_geom), 4326))
FROM workingView
```

In Q2A and Q2B the clause `DISTINCT` is used to display only once the IBs that have a non-empty intersection with more than one river buffer. This circumstance takes place when two distinct rivers join in one point.

Query Q3 updates column `status` (of table `Buildings`) for each IB.

Q3

```
UPDATE Buildings AS b
  SET   status = w.status
  FROM   workingView AS w
  WHERE  b.id = w.building_id;
```

*STEP 2: ranking of the IBs*

For the generic building ( $b_i$ ), the parameter  $\Delta h$  (in Eq.2 of the paper) is computed as follows:

- a) estimation of the elevation of  $b_i$  (let us denote it as  $\text{elev}_{b_i}$ )
- b) identification of the point (let denote it as  $Q_j$ ) such that:
  - $Q_j$  belongs to the river whose buffer has no intersection with the geometry of  $b_i$ ;
  - $Q_j$  is at the minimum distance from  $b_i$ ;
- c) estimation of the elevation of  $Q_j$  (let as denote it as  $\text{elev}_{Q_j}$ );
- d) computation of  $\Delta h = (\text{elev}_{b_i} - \text{elev}_{Q_j})$ .

To simplify the formulation of the remaining SQL queries, we added the columns: `partial_S`, `cp_cr` (the Closest Point, to building  $b_i$ , on the Closest River) and `e_cp_cr` (the elevation of point `cp_cr`) to the table `Buildings`. In these columns they will be copied, in order: `MAX(P/d)` (see Eq.2), the coordinates of point  $Q_j$  and its elevation.

```
ALTER TABLE Buildings
  ADD COLUMN partial_S numeric,
  ADD COLUMN cp_cr geometry(Point, SRS_code),
  ADD COLUMN e_cp_cr numeric;
```

Initialization of columns `cp_cr` and `e_cp_cr`:

```
UPDATE Buildings
  SET   cp_cr = ST_GeometryFromText('Point(0.0 0.0)', SRS_code)
  WHERE status;
```

```
UPDATE Buildings
  SET   e_cp_cr = -1
  WHERE status;
```

*Computation of partial\_S*

Copy of the value `MAX(P/d)` in the column `partial_S` of the tuples referring to IBs.

Q4

```
WITH CTE1 AS (
  SELECT building_id, distance AS d, P
  FROM   workingView)

UPDATE Buildings AS new
SET partial_S =
  (SELECT DISTINCT
   CASE
     WHEN d BETWEEN 0 AND 0.999 THEN MAX(P)
     WHEN d BETWEEN 1 AND 150   THEN MAX(P/d)
   END AS partial_S
  FROM CTE1 AS ctel
  WHERE ctel.building_id = new.building_id
  GROUP BY building_id);
```

Q4 sets the value of `partial_S` to `P` if  $d < 1m$ , otherwise it is set to  $\max(P/d)$  (see Eq.2).

*Estimation of the elevation of the generic building  $b_i$*

Q5 updates the column elevation (of Buildings).

Q5

```
WITH CTE2 AS (  
  SELECT b.id AS building_id, c.id AS CL_id,  
         ST_Distance(b.geom, ST_ClosestPoint(c.geom, b.geom)) AS distance,  
         c.elevation  
  FROM Buildings AS b, ContourLines AS c  
  WHERE status  
)
```

```
UPDATE Buildings AS b  
SET elevation =  
(SELECT MIN(elevation) AS elevation  
 FROM CTE2 AS a  
 WHERE distance =  
  (SELECT MIN(x.distance) AS distance  
   FROM CTE2 AS x  
   WHERE a.building_id = x.building_id AND  
         b.building_id = a.building_id AND b.status  
   GROUP BY x.building_id  
   ORDER BY x.building_id ASC)  
 GROUP BY a.building_id  
 ORDER BY a.building_id ASC  
);
```

*Note*

To speed-up the execution of query Q5, it is sufficient to replace in it table `ContourLines` with table `CL_insideStrip`, this latter computed as shown below. The spatial operation `ST_Intersection(ST_buffer(geom, L1), geom)` returns, for each contour line in `ContourLines`, the geometry of the portion of contour line that falls inside a strip of terrain of a given width (`L1` meters, here); strip centered around the geometry that models the river bed.

```
CREATE TABLE CL_insideStrip (  
  id          serial PRIMARY KEY,  
  geom        geometry(MultiLineString, SRS_code),  
  elevation   numeric  
);
```

```
INSERT INTO CL_insideStrip (geom, elevation)  
  SELECT ST_Intersection(ST_buffer(geom, L1), geom), elevation  
  FROM ContourLines;
```

Q6 copies (only for the IBs) the coordinates of point `Qi` in column `cp_cr`. The filter `ST_DWithin(river_geom, building_geom, L2)` reduces the number of rivers to be taken into account to those whose (minimum) Euclidean distance from the generic building does not exceed `L2` meters.

Q6

```
WITH CTE3 AS (  
  SELECT  
    building_id, river_name,  
    ST_ClosestPoint(river_geom, building_geom) AS cp_river_IB,  
    ST_Distance(building_geom, ST_ClosestPoint(river_geom, building_geom))  
    AS distance  
  FROM workingView
```

```

WHERE ST_DWithin(river_geom, building_geom, L2)
)

```

```

UPDATE Buildings AS s
SET cp_cr =
(SELECT cp_river_IB
FROM CTE3 AS a
WHERE distance =
(SELECT MIN(distance)
FROM CTE3 AS b
WHERE s.building_id = a.building_id AND a.building_id=b.building_id
GROUP BY b. building_id)
GROUP BY a.building_id, river_name, cp_river_IB, distance
);

```

Q7 updates column e\_cp\_cr (of table Buildings)

Q7

```

WITH CTE4 AS (
SELECT s.id, ST_Distance(c.geom, s.cp_cr) AS distance, c.elevation
FROM Buildings AS s, ContourLines AS c
WHERE ST_DWithin(c.geom, s.cp_cr, L2) AND status
)

```

```

UPDATE Buildings AS s1
SET e_cp_cr =
(SELECT DISTINCT elevation
FROM CTE4 AS a
WHERE s1.id = id AND a.distance =
(SELECT MIN(distance)
FROM CTE4 AS b
WHERE a.id=b.id AND s1.id = b.id
GROUP BY b.id)
)
WHERE s1.status;

```

*Computation of S and update of the corresponding column in Buildings.*

Q8

```

WITH CTE5 AS (
SELECT id, elevation, e_cp_cr,
CASE
WHEN (b.elevation - b.e_cp_cr) < 0 THEN
(b.partial_S * (1 -(b.elevation - b.e_cp_cr )))
ELSE (b.partial_S / (1 + (b.elevation - b.e_cp_cr)))
END AS S
FROM Buildings AS b
WHERE b.status
)

```

```

UPDATE Buildings AS b1
SET S =
(SELECT S
FROM CTE5 AS a
WHERE b1.id = a.id);

```
